# Supplementary material
Source: PubMed Central journal article supplement (PMC2887551)
Supplement: supp_58_6_779__1.pdf [file supp_58_6_779__1.pdf]

**Supplementary Table S1. Structures of BHT inhibitors**

| Molecule                               | Structure                                                                            |
|----------------------------------------|--------------------------------------------------------------------------------------|
| A-3                                    | 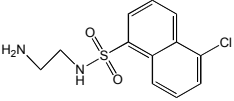    |
| W7                                     |    |
| Tyrphostin AG1478                      |     |
| Tyrphostin 9                           |     |
| GW 5074                                |    |
| 5,8,11,14-Eicosatetraynoic acid (ETYA) |  |
| FK-506                                 |   |
| L-744,832                              |  |

|              |                                                                                      |
|--------------|--------------------------------------------------------------------------------------|
| Clozapine    | 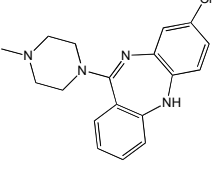    |
| Fluspirilene |     |
| GW 9662      |     |
| CGP-37157    |     |
| TMB-8        |   |
| Nigericin    |  |
| YC-1         |   |
| HA14-1       |   |

---

**Toenjes, K. A., Stark, B. C., Brooks, K. M. & Johnson, D. I. (2009).** Inhibitors of cellular signalling are cytotoxic or block the budded-to-hyphal transition in the pathogenic yeast *Candida albicans*. *Journal Med Microbiol* **58**, 779–790.

---
